# Supplementary material
Source: PubMed Central journal article supplement (PMC6645758)
Supplement: ao7b01657_si_001.pdf [file ao7b01657_si_001.pdf]

## Supporting Information for:

### **Multidisciplinary Approach to the Transfection of Plasmid DNA by a Non-Viral Nanocarrier Based on a Gemini-Bolaamphiphilic Hybrid Lipid**

María Martínez-Negro,<sup>a</sup> Andrés Guerrero-Martínez,<sup>a</sup> Luis García-Río,<sup>b</sup> Òscar Domènech,<sup>c</sup> Emilio Aicart,<sup>a</sup> Conchita Tros de Ilarduya<sup>d</sup> and Elena Junquera <sup>\*a</sup>

<sup>a</sup>Departamento de Química Física I, Facultad de Ciencias Químicas, Universidad Complutense de Madrid, 28040 Madrid, Spain

<sup>b</sup>Departamento de Química Física, Centro de Investigación en Química Biológica y Materiales Moleculares, Universidad de Santiago de Compostela, 15782 Santiago de Compostela, Spain

<sup>c</sup>Departamento de Fisicoquímica, Facultat de Farmàcia, Universitat de Barcelona, 08028 Barcelona, Spain

<sup>d</sup>Departamento de Farmacia y Tecnología Farmacéutica, Facultad de Farmacia, Universidad de Navarra, IdiSNA, Navarra Institute for Health Research, 31008 Pamplona, Spain

\*Author to whom the correspondence should be addressed:

E. Junquera: Fax: +34913944135 e-mail: [junquera@quim.ucm.es](mailto:junquera@quim.ucm.es)

**Table S1. Hydrodynamic diameter ( $D_h$ ) and polydispersity (PDI) values of  $C_6C_{22}C_6$ /DOPE-pDNA lipoplexes at several effective charge ratios ( $\rho_{\text{eff}}$ ) and two molar compositions of the cationic lipid in the mixed lipids ( $\alpha = 0.2$  and  $0.5$ ). Errors are less than 10%**

|                                | $\rho_{\text{eff}} = 4$ |      | $\rho_{\text{eff}} = 10$ |      |
|--------------------------------|-------------------------|------|--------------------------|------|
|                                | $D_h$ (nm)              | PDI  | $D_h$ (nm)               | PDI  |
| $\alpha = 0.2$                 |                         |      |                          |      |
| $C_6C_{22}C_6$ /DOPE- pEGFP-C3 | 129                     | 0.25 | 134                      | 0.24 |
| $C_6C_{22}C_6$ /DOPE- pCMV-Luc | 130                     | 0.23 | 115                      | 0.19 |
| $\alpha = 0.5$                 |                         |      |                          |      |
| $C_6C_{22}C_6$ /DOPE- pEGFP-C3 | 161                     | 0.15 | 141                      | 0.11 |
| $C_6C_{22}C_6$ /DOPE- pCMV-Luc | 212                     | 0.34 | 183                      | 0.30 |

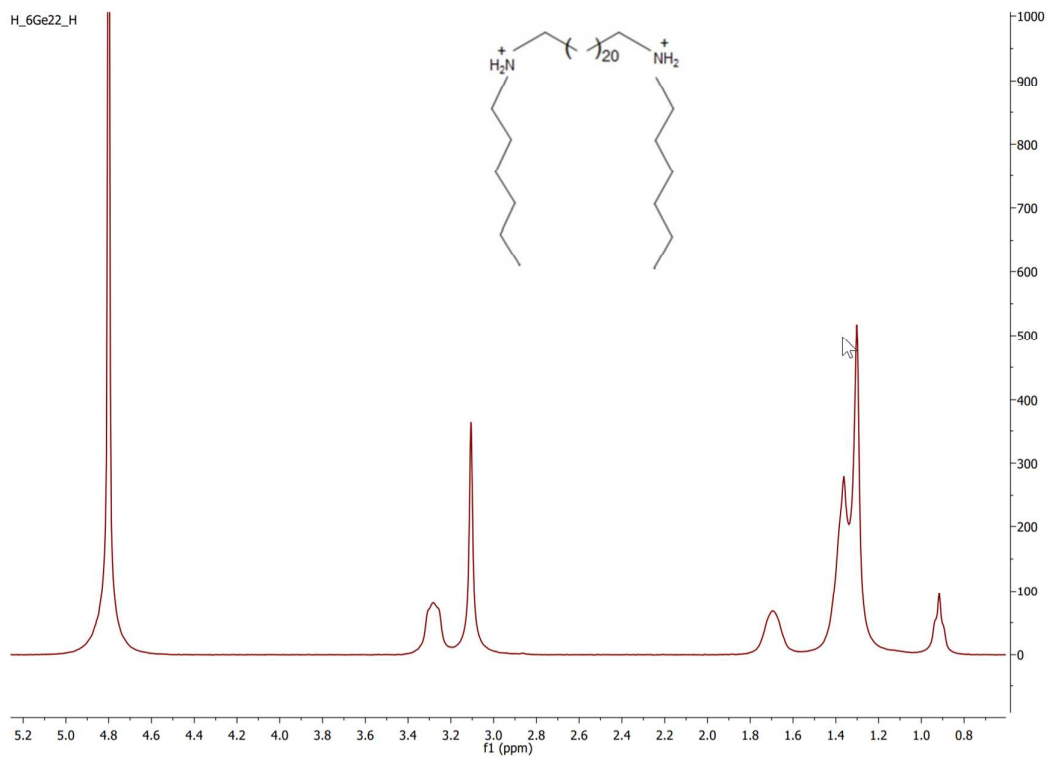

**Figure S1.**  $^1\text{H}$  NMR spectrum (300 MHz,  $\text{D}_2\text{O}$ ,  $25^\circ\text{C}$ ) of  $\text{C}_6\text{C}_{22}\text{C}_6$ .

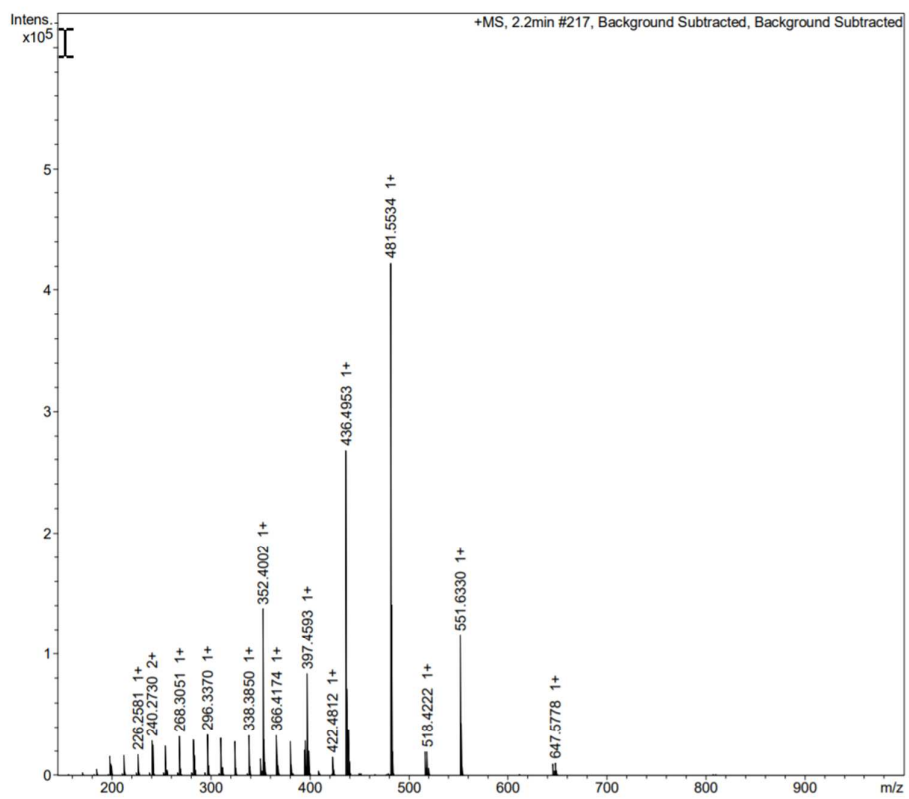

**Figure S2.** Electrospray ionization mass spectrum of  $C_6C_{22}C_6$ .

Table S2. Data of the electrospray ionization mass spectrum of C<sub>6</sub>C<sub>22</sub>C<sub>6</sub>

| #  | m/z      | I      | Res.  | FWHM   | z  | Mol. Mass | #   | m/z      | I      | Res.  | FWHM   | z  | Mol. Mass |
|----|----------|--------|-------|--------|----|-----------|-----|----------|--------|-------|--------|----|-----------|
| 1  | 156.1790 | 591    | 12456 | 0.0125 |    |           | 67  | 380.4331 | 28733  | 13523 | 0.0281 | 1+ | 380.4333  |
| 2  | 170.1938 | 2002   | 10909 | 0.0156 |    |           | 68  | 381.4369 | 8789   | 13588 | 0.0281 | 1+ | 380.4333  |
| 3  | 182.1932 | 596    | 9406  | 0.0194 |    |           | 69  | 382.4406 | 1478   | 12889 | 0.0297 | 1+ | 380.4333  |
| 4  | 184.2100 | 5346   | 10468 | 0.0176 | 1+ | 184.2100  | 70  | 394.4491 | 21254  | 16872 | 0.0234 |    |           |
| 5  | 185.2130 | 824    | 11169 | 0.0166 | 1+ | 184.2100  | 71  | 395.4457 | 29390  | 13476 | 0.0293 | 1+ | 395.4453  |
| 6  | 196.2109 | 1094   | 12004 | 0.0163 |    |           | 72  | 396.4494 | 7669   | 14171 | 0.0280 | 1+ | 395.4453  |
| 7  | 197.2182 | 470    | 12691 | 0.0155 |    |           | 73  | 397.4593 | 84160  | 18115 | 0.0219 | 1+ | 397.4591  |
| 8  | 198.2259 | 15792  | 13671 | 0.0145 | 2+ | 395.4453  | 74  | 398.4631 | 20538  | 14547 | 0.0274 | 1+ | 397.4591  |
| 9  | 198.7259 | 1042   | 14980 | 0.0133 | 2+ | 395.4453  | 75  | 399.4681 | 2616   | 14865 | 0.0269 | 1+ | 397.4591  |
| 10 | 199.2317 | 9963   | 10514 | 0.0189 | 2+ | 397.4591  | 76  | 408.4660 | 4035   | 13222 | 0.0309 |    |           |
| 11 | 199.7338 | 2560   | 11275 | 0.0177 | 2+ | 397.4591  | 77  | 409.4694 | 1399   | 15153 | 0.0270 |    |           |
| 12 | 200.2358 | 639    | 16677 | 0.0120 | 2+ | 397.4591  | 78  | 422.4812 | 15562  | 14388 | 0.0294 | 1+ | 422.4814  |
| 13 | 210.2281 | 1442   | 10367 | 0.0203 |    |           | 79  | 423.4856 | 5130   | 15442 | 0.0274 | 1+ | 422.4814  |
| 14 | 212.2421 | 16646  | 12773 | 0.0166 | 1+ | 212.2423  | 80  | 436.4953 | 268760 | 19499 | 0.0224 | 1+ | 436.4964  |
| 15 | 213.2466 | 2964   | 14189 | 0.0150 | 1+ | 212.2423  | 81  | 437.4991 | 71871  | 15086 | 0.0290 | 1+ | 436.4964  |
| 16 | 224.2426 | 2056   | 13410 | 0.0167 |    |           | 82  | 438.5093 | 38766  | 13903 | 0.0315 | 1+ | 436.4964  |
| 17 | 226.2581 | 17362  | 10905 | 0.0207 | 1+ | 226.2581  | 83  | 439.5154 | 11624  | 16139 | 0.0272 | 1+ | 436.4964  |
| 18 | 227.2611 | 3165   | 11324 | 0.0201 | 1+ | 226.2581  | 84  | 440.5191 | 1645   | 13791 | 0.0319 | 1+ | 436.4964  |
| 19 | 228.2669 | 426    | 12664 | 0.0180 | 1+ | 226.2581  | 85  | 449.1657 | 1526   | 16582 | 0.0271 |    |           |
| 20 | 238.2580 | 2082   | 11552 | 0.0206 |    |           | 86  | 451.1636 | 1291   | 13600 | 0.0332 |    |           |
| 21 | 240.2730 | 29535  | 12534 | 0.0192 | 2+ | 479.5386  | 87  | 465.5232 | 827    | 13732 | 0.0339 |    |           |
| 22 | 240.7727 | 1510   | 11063 | 0.0218 | 2+ | 479.5386  | 88  | 477.1995 | 896    | 13113 | 0.0364 |    |           |
| 23 | 241.2790 | 25405  | 13093 | 0.0184 | 2+ | 481.5533  | 89  | 479.1957 | 1345   | 15427 | 0.0311 |    |           |
| 24 | 241.7808 | 6578   | 11051 | 0.0219 | 2+ | 481.5533  | 90  | 480.6936 | 596    | 8571  | 0.0561 |    |           |
| 25 | 242.2835 | 1653   | 11065 | 0.0219 | 2+ | 481.5533  | 91  | 481.5534 | 423029 | 16798 | 0.0287 | 1+ | 481.5533  |
| 26 | 252.2733 | 2229   | 11054 | 0.0228 |    |           | 92  | 482.5567 | 140969 | 15463 | 0.0312 | 1+ | 481.5533  |
| 27 | 253.2770 | 461    | 11464 | 0.0221 |    |           | 93  | 483.5616 | 19608  | 13718 | 0.0353 | 1+ | 481.5533  |
| 28 | 254.2889 | 24869  | 10803 | 0.0235 | 1+ | 254.2890  | 94  | 484.5670 | 1957   | 13689 | 0.0354 | 1+ | 481.5533  |
| 29 | 255.2927 | 4660   | 11261 | 0.0227 | 1+ | 254.2890  | 95  | 516.4241 | 19777  | 15222 | 0.0339 | 1+ | 516.4243  |
| 30 | 256.2963 | 470    | 13387 | 0.0191 | 1+ | 254.2890  | 96  | 517.4282 | 6332   | 15016 | 0.0345 | 1+ | 516.4243  |
| 31 | 266.2902 | 2532   | 12110 | 0.0220 |    |           | 97  | 518.4222 | 19928  | 14846 | 0.0349 | 1+ | 518.4222  |
| 32 | 268.3051 | 32777  | 13132 | 0.0204 | 1+ | 268.3051  | 98  | 519.4254 | 5692   | 14390 | 0.0361 | 1+ | 518.4222  |
| 33 | 269.3082 | 5778   | 11232 | 0.0240 | 1+ | 268.3051  | 99  | 520.4306 | 982    | 15002 | 0.0347 | 1+ | 518.4222  |
| 34 | 270.3163 | 600    | 23086 | 0.0117 | 1+ | 268.3051  | 100 | 551.6330 | 116040 | 16377 | 0.0337 | 1+ | 551.6333  |
| 35 | 280.3056 | 2318   | 11242 | 0.0249 |    |           | 101 | 552.6370 | 43672  | 16043 | 0.0344 | 1+ | 551.6333  |
| 36 | 281.3099 | 460    | 12735 | 0.0221 |    |           | 102 | 553.6406 | 7657   | 14594 | 0.0379 | 1+ | 551.6333  |
| 37 | 282.3208 | 30174  | 11271 | 0.0250 | 1+ | 282.3214  | 103 | 554.6505 | 626    | 21687 | 0.0256 | 1+ | 551.6333  |
| 38 | 283.3255 | 16649  | 11249 | 0.0252 | 1+ | 282.3214  | 104 | 611.6637 | 700    | 14485 | 0.0422 |    |           |
| 39 | 283.8293 | 4633   | 11525 | 0.0246 | 2+ | 566.6515  | 105 | 612.6635 | 415    | 16737 | 0.0366 |    |           |
| 40 | 284.3314 | 1793   | 12980 | 0.0219 | 1+ | 282.3214  | 106 | 613.6750 | 78     | 21300 | 0.0288 |    |           |
| 41 | 294.3208 | 2560   | 11706 | 0.0251 |    |           | 107 | 645.5798 | 9513   | 15018 | 0.0430 | 1+ | 645.5797  |
| 42 | 296.3370 | 34325  | 12699 | 0.0233 | 1+ | 296.3372  | 108 | 646.5828 | 3512   | 13418 | 0.0482 | 1+ | 645.5797  |
| 43 | 297.3410 | 7858   | 13048 | 0.0228 | 1+ | 296.3372  | 109 | 647.5778 | 10237  | 15364 | 0.0421 | 1+ | 647.5780  |
| 44 | 298.3514 | 839    | 22504 | 0.0133 | 1+ | 296.3372  | 110 | 648.5815 | 3820   | 14709 | 0.0441 | 1+ | 647.5780  |
| 45 | 308.3380 | 1610   | 12045 | 0.0256 |    |           | 111 | 649.5906 | 632    | 15876 | 0.0409 | 1+ | 647.5780  |
| 46 | 310.3530 | 31480  | 12971 | 0.0239 | 1+ | 310.3533  | 112 | 650.5768 | 168    | 20672 | 0.0315 | 1+ | 647.5780  |
| 47 | 311.3575 | 6657   | 12356 | 0.0252 | 1+ | 310.3533  | 113 | 711.5964 | 172    | 20577 | 0.0346 |    |           |
| 48 | 312.3629 | 1023   | 13317 | 0.0235 | 1+ | 310.3533  | 114 | 712.5963 | 109    | 29860 | 0.0239 |    |           |
| 49 | 322.3518 | 506    | 13751 | 0.0234 |    |           | 115 | 739.6361 | 186    | 27003 | 0.0274 |    |           |
| 50 | 324.3692 | 28683  | 15646 | 0.0207 | 1+ | 324.3693  | 116 | 779.4538 | 390    | 20577 | 0.0379 |    |           |
| 51 | 325.3726 | 6330   | 12431 | 0.0262 | 1+ | 324.3693  | 117 | 780.4526 | 189    | 15064 | 0.0518 |    |           |
| 52 | 326.3780 | 882    | 13723 | 0.0238 | 1+ | 324.3693  | 118 | 781.4500 | 462    | 17287 | 0.0452 |    |           |
| 53 | 336.3708 | 1861   | 12546 | 0.0268 |    |           | 119 | 782.4543 | 206    | 16160 | 0.0484 |    |           |
| 54 | 337.3750 | 516    | 18356 | 0.0184 |    |           | 120 | 807.4838 | 891    | 18478 | 0.0437 |    |           |
| 55 | 338.3850 | 33288  | 13311 | 0.0254 | 1+ | 338.3854  | 121 | 808.4861 | 230    | 14389 | 0.0562 |    |           |
| 56 | 339.3897 | 7274   | 12009 | 0.0283 | 1+ | 338.3854  | 122 | 809.4815 | 900    | 14853 | 0.0545 |    |           |
| 57 | 340.3961 | 1037   | 12507 | 0.0272 | 1+ | 338.3854  | 123 | 810.4821 | 334    | 14229 | 0.0570 |    |           |
| 58 | 350.3860 | 13723  | 13336 | 0.0263 | 1+ | 350.3860  | 124 | 811.4713 | 65     | 36345 | 0.0223 |    |           |
| 59 | 351.3893 | 3493   | 12994 | 0.0270 | 1+ | 350.3860  | 125 | 835.5156 | 401    | 14757 | 0.0566 |    |           |
| 60 | 352.4002 | 137820 | 13562 | 0.0260 | 1+ | 352.4009  | 126 | 836.5209 | 212    | 24924 | 0.0336 |    |           |
| 61 | 353.4045 | 29828  | 12204 | 0.0290 | 1+ | 352.4009  | 127 | 837.5177 | 510    | 13287 | 0.0630 |    |           |
| 62 | 354.4142 | 10931  | 11626 | 0.0305 | 1+ | 352.4009  | 128 | 838.5131 | 245    | 15755 | 0.0532 |    |           |
| 63 | 355.4200 | 2329   | 13570 | 0.0262 | 1+ | 352.4009  |     |          |        |       |        |    |           |
| 64 | 366.4174 | 33410  | 16355 | 0.0224 | 1+ | 366.4174  |     |          |        |       |        |    |           |
| 65 | 367.4207 | 8056   | 14141 | 0.0260 | 1+ | 366.4174  |     |          |        |       |        |    |           |
| 66 | 368.4255 | 1290   | 12756 | 0.0289 | 1+ | 366.4174  |     |          |        |       |        |    |           |
